1 **Phytochemical Constituency Profiling and Antimicrobial Activity Screening of Seaweeds**  
2 **Extracts Collected from the Bay of Bengal Sea Coasts**

3  
4  
5 *Mahmudul Hasan<sup>1\*</sup>, Md. Abdus Shukur Imran<sup>1</sup>, Farhana Rumzum Bhuiyan<sup>2</sup>, Sheikh Rashed Ahmed<sup>3</sup>, Parsha*  
6 *Shanzana<sup>4</sup>, Mahmuda Akter Moli<sup>1</sup>, Shakhawat Hossain Foysal<sup>5</sup>, Suma Bala Dabi<sup>1</sup>*

7  
8  
9 <sup>1</sup>*Department of Pharmaceuticals and Industrial Biotechnology, Sylhet Agricultural University, Sylhet-3100.*

10 <sup>2</sup>*Department of Botany, University of Chittagong, Chittagong, Chittagong-4331*

11 <sup>3</sup>*Department of Plant and Environmental Biotechnology, Sylhet Agricultural University, Sylhet-3100.*

12 <sup>4</sup>*Department of Molecular Biology and Genetic Engineering, Sylhet Agricultural University, Sylhet-3100.*

13 <sup>5</sup>*Department of Genetic Engineering and Biotechnology, Shahjalal University of Science and Technology, Sylhet-*  
14 *3114.*

15  
16  
17  
18  
19  
20 **\*Corresponding Author:**

21 Mahmudul Hasan,

22 *Assistant Professor*

23 *Department of Pharmaceuticals and Industrial Biotechnology*

24 *Faculty of Biotechnology and Genetic Engineering*

25 *Sylhet Agricultural University, Sylhet-3100.*

26 E-mail: mhasan.pib@sau.ac.bd, Telephone: 008801723698461

27  
28  
29  
30  
31  
32  
33

34 **Abstract**

35 Seaweeds are able to produce a great variety of secondary metabolites that are characterized by a broad  
36 spectrum of biological activities. Two seaweeds species, namely *Hypnea musciformis* and *Enteromorpha*  
37 *intestinalis* were studied to evaluate the phytochemical constituency and antimicrobial activities. First of  
38 all, crude extracts of both sea weeds were prepared by two different extraction methods (soaking and  
39 water bath) using different solvents. Phytochemicals profiling results revealed the presence of bioactive  
40 compounds (flavonoids, alkaloids, tannin, saponin and phenols) in both seaweed extracts. Quantification  
41 results for ethanolic extracts of *H. musciformis* and *E. intestinalis* estimated 51 mg and 43 mg tannins in  
42 per gram of dried samples and flavonoids contents were found 67 mg and 57 mg/g mg QE/g respectively.  
43 Total phenolic contents were determined in terms of gallic acid equivalent (GAE). *H. musciformis*  
44 exhibited higher amount of phenolics ( $59 \pm 0.0002$  mg GAE/g) than *E. intestinalis* extracts ( $41 \pm 0.0002$   
45 mg GAE/g). In antimicrobial activity test, ethanol extracts of *H. musciformis* and *E. intestinalis* were  
46 found 10 mm of inhibition diameter against all of the bacterial strains. Besides, methanol extracts of *E.*  
47 *intestinalis* were more susceptible to *Staphylococcus aureus* and *Pseudomonas* which was close to the  
48 inhibition diameter (>15 mm) of the mainstream antibiotic; Gentamicin. Moreover, *Klebsiella sp.* was  
49 found more susceptible to ethanol and methanol extracts of *Hypnea musciformis* as it showed inhibition  
50 zone greater than 15 mm. Both Seaweed extracts possessed higher amount of phytochemicals and showed  
51 promising antimicrobial activities when compared with the standards.

52

53 **Keywords:** Antimicrobial activity; Phytochemicals; Seaweeds; *Hypnea musciformis*; *Enteromorpha*  
54 *intestinalis*;

55

56

57

58

## 59 ***1. Introduction***

60 Millions of people are being afflicted by different infectious diseases induced by pathogenic bacteria.  
61 Moreover, the phenomena of high mortality rate and the emergence of new multi-drug resistance,  
62 bacterial strains has become one of the threatening health problems worldwide [[1,2]. Different drug  
63 molecules are being applied to combat against those microorganisms. Antibiotics, metal ions, and  
64 various quaternary ammonium compounds are being used worldwide though these antimicrobial  
65 compounds are also being claimed to be associated with antibiotic resistance, complex chemical  
66 synthesis, environmental pollution, and high cost [3,4]. However, natural antibacterial agents have  
67 been recently identified to overcome these disadvantages [5]. Marine organisms are one of the richest  
68 sources of bioactive compounds and chemical diversity [6,7]. Different marine compounds, including  
69 seaweeds have historical contribution against the predators defense [8,9], and could be a promising  
70 antibacterial agents. [10,11].

71 Marine algae are one of the largest producers of biomass in the marine environmental [12]. Seaweeds are  
72 plant like ocean organisms that are botanically classified as microphysics marine algae. Edible seaweeds  
73 are often called “sea vegetables” seaweeds come in an amazing variety of beautiful shapes, colors and  
74 sizes and found in all of the world’s oceans. They are source materials for structurally unique natural  
75 products with pharmacological and biological activities [13]. Among the marine organisms, the  
76 macroalgae (seaweeds) occupy an important place as a source of biomedical compounds [14]. They are  
77 the most interesting algae group because of their broad spectrum of biological activities such as  
78 antimicrobial [15], antiviral [16], anti-allergic [17], anticoagulant [18], anticancer [19], antifouling [20]  
79 and antioxidant activities [21]. Importantly, seaweeds represent a potential source of antimicrobial  
80 substances due to their diversity of secondary metabolites with antiviral, antibacterial and antifungal  
81 activities [22]. Structurally diversified secondary metabolites of Seaweeds offer defense against herbivores,  
82 fouling organisms and pathogens and also play role in reproduction, protection from UV radiation and as  
83 allelopathic agents [23]. The bactericidal agents found in algae include aminoacids, terpenoids,

84 phlorotannins, acrylic acid, phenolic compounds, steroids, halogenated ketones and alkanes, cyclic  
85 polysulphides and fatty acids [24]. Some of these metabolites extracted from seaweed such as iodine,  
86 carotene, glycerol, alginates, and carrageenans have been used in pharmaceutical industries [25,26].

87 The Bay of Bengal is the northeastern part of the Indian Ocean, bounded on the west and northwest by  
88 India on the north by Bangladesh. In Bangladesh, potential seaweeds are being reported in terms of food  
89 staffs and pharmaceutical agents from the south-eastern part of the mainland and offshore island. [27,28].

90 *Caulerparacemos*, *Enteromorphas*, *Gelidiellatenuissima*, *Gelidiumpusillum*, *Halymeniadiscoidea*,  
91 *Hypneapannosa*, *Hydroclathrusclathratus*, *Sargassumsp* are commercially important seaweeds in  
92 Bangladesh [29]. Moreover, settling a longstanding India-Bangladesh maritime boundary dispute, a  
93 Hague-based international court has recently awarded Bangladesh 19,467 square kilometers out of 25,602  
94 sq km disputed area in the Bay of Bengal. Bangladesh is rich with around 133 species of seaweeds and  
95 eight of them are commercially important. Seaweed has great value in providing low-cost, wholesome  
96 nutrition and therapeutic protection. Still now, there are scanty information regarding the pharmaceutical  
97 potentiality of these species. That is why the objectives of the present study were to evaluate  
98 antimicrobial activity and phytochemical pattern of two widely available seaweed species (*Hypnea*  
99 *musciformis*, *Enteromorpha intestinalis*) of the Bay of Bengal sea coast.

100

## 101 **2. Materials and Methods**

### 102 **2.1 Seaweed material and description of study area**

103 *Two seaweeds species; H. musciformis* and *E. intestinalis* were used in this study. They were freshly  
104 collected from North Nuniar Chor, Cox's bazar (21°35'0"N 92°01'0"E). (**Fig. 1**). Collected samples were  
105 washed in running water for 10 minutes and then transported to the laboratory and shade dried at 35±3 °C  
106 for 36 h. The shade dried seaweeds were powdered using electronic blender and used for further  
107 experiments.

## 108 **2.2 Preparation of seaweed extracts and fractions**

109 The extracts were prepared by two different methods (water bath and soaking method). Each of 20 grams  
110 of powdered seaweed samples were soaked in a conical flask containing 160 mL of the distilled water,  
111 ethanol, methanol and acetone solvents. In soaking method, the samples were gently mixed by shaking  
112 and left for 72 hours at room temperature. In water bath method, the samples were mixed gently using the  
113 same solvents and left at 65°C for 4 hours. The liquid phase was then filtered with whatman no. 1 filter  
114 paper and allowed to be concentrated at reduced pressure to give specific solvent extracts. The crude  
115 extracts were used to test qualitative and quantitative analysis for secondary metabolites and antimicrobial  
116 activities against different bacterial strains.

## 117 **2.3 Preliminary qualitative phytochemical analysis**

118 Preliminary qualitative phytochemical analysis was carried out to identify the secondary metabolites  
119 present in the alcoholic extracts of *H. musciformis* and *E. intestinalis*.

### 120 **2.3.1 Flavonoids Test**

121 For screening of flavonoids, sodium hydroxide test and shinoda test were conducted. After the addition of  
122 2ml 10% aqueous sodium hydroxide solution, yellow color precipitation indicated the presence of  
123 flavonoid. Yellow color turned into colorless diluted hydrochloric acid was added. In shinoda test, 2  
124 drops of conc. HCl followed by a few fragments of magnesium ribbon were added. Formation of pink,  
125 reddish or brown color specifies the presence of flavonoids [30].

### 126 **2.3.2 Alkaloids Test**

127 For this test, few drops of Wagner's reagents or Dragendorff's reagent in crude extracts were added.  
128 Appearance of a reddish-brown or orange red precipitation considered as the positive test for alkaloids  
129 [30,31,32,33].

130

131 **2.3.3 Test for Tannins**

132 Addition of 2-3 drops of 5% ferric chloride to the crude extracts turned into brownish green or a blue-  
133 black color results the presence of tannin [32].

134 **2.3.4 Test for Phenols**

135 A fresh mixture was produced from equal amount of 1% ferric chloride solution and 1% potassium  
136 ferrocyanide, 3 drops of the mixture added to the extract and filtered this solution, presence of phenol  
137 obtained from the formation of a bluish-green color [33].

138 **2.3.5 Test for Saponins**

139 In a test tube, 2.5 ml of extract was added to 10 ml of sterile distilled water. The test tube was sealed with  
140 cap and shaken vigorously for about 30 seconds. It was then allowed to stand for 30 minutes. Formation  
141 of honeycomb froth indicated the presence of saponins [32].

142 **2.4 Quantitative analysis of phytochemical constituency**

143 Quantitative analysis for phytochemicals were performed for flavonoids, tannin, and phenolics

144 **2.4.1 Determination of Total Flavonoids Content**

145 Total flavonoids content was determined by following the method by Wang [34]. About 0.2 mL of 10%  
146  $AlCl_3$ , 0.2mL of 1M potassium acetate and 5.6 mL of distilled water followed by 1 mL of methanolic  
147 extract at a concentration of 1 mg/mL was added in a test tube to estimate flavonoid content. Blank was  
148 prepared without methanol. A series of standard ((20, 40, 60,80, 100  $\mu$ g/mL) was prepared using  
149 Quercetin followed by 0.2 mL of  $AlCl_3$ , .2mL of 1M potassium acetate, 5.6 mL of distilled water. The  
150 mixtures were kept at room temperature for 30 minutes. Absorbance was taken at 415 nm using UV-vis  
151 spectrophotometer. The result was expressed in mg QE/g of the dried plant extractives.

152

#### 153 ***2.4.2 Determination of Total Tannins content***

154 The tannins content was estimated by Folin-Ciocalteu's method for both seaweed species as described by  
155 Kavita and Indira, 2016. [35] About 0.1 mL of the sample extract was added to a test tube containing 7.5  
156 mL of distilled water and 0.5 mL of Folin-Ciocalteu phenol reagent. 1 mL of 35% Na<sub>2</sub>CO<sub>3</sub> and dilute to  
157 10 mL with distilled water. The mixtures were shaken well and kept at room temperature for 30 minutes.  
158 A set of reference standard solutions of tannic acid (20, 40, 60, 80, 100 µg/mL were prepared.  
159 Absorbance for test and standard solutions were measured against the blank at 700 nm with an UV/  
160 Visible spectrophotometer. The estimation of the tannin content was carried out in triplicate. The tannin  
161 content was expressed in terms of mg of Tannic acid equivalent per g of dried sample.

#### 162 ***2.4.3 Determination of Total Phenolics content***

163 The total phenolic content of dry extract was performed with Folin-Ciocalteu assay with slight described  
164 by Singleton et al., (1999) with slight modification [35,36]. About 1 mL of methanolic extract sample  
165 (1mg/mL) was mixed with 5 mL of 10% FolinCiocalteu Reagent and 5 mL of 7.5% Na<sub>2</sub>CO<sub>3</sub>. Blank was  
166 concomitantly prepared, containing 1 ml methanol, 5 ml of 10% FolinCiocalteu's reagent and 5 ml of  
167 7.5% of NaHCO<sub>3</sub>. The mixtures were incubated for 20 minutes at 25°C followed by measuring  
168 absorbance taken at 760 nm against blank. Gallic acid was used as standard and reactions were  
169 performed as triplicates and mean value of absorbance was obtained. Calibration line was constructed  
170 using gallic acid as standard. The total content of phenol in extract was expressed in terms of Gallic acid  
171 equivalent (mg of GAE/g of extract).

#### 172 ***2.5 Antibacterial activity of seaweeds extracts***

##### 173 ***2.5.1 Microorganisms and media***

174 Five bacteria species obtained from the Laboratory of Microbiology, Department of Genetic Engineering  
175 and Biotechnology, Shahjalal University of Science and Technology and used as the antimicrobial test

176 strains: There were four gram negative (*Escherichia coli*, *Klebsiella sp.*, *Pseudomonas sp.*, *Salmonella*  
177 *sp.*) and one gram positive (*Staphylococcus aureus*) bacteria. The bacterial strains were maintained on the  
178 nutrient agar medium [36].

### 179 **2.5.2 Agar disk-diffusion assay**

180 The screening of antimicrobial activity of the seaweed extracts was carried out with agar disk-diffusion  
181 method using Muller Hinton Agar (MHA) medium [31,37]. Bacterial culture (50 µL) was taken from the  
182 nutrient broth culture using 100 µL micropipette and poured into the sterile plate containing Muller-  
183 Hinton agar medium. Sterile cotton was used for streaking the dried surface of plates. Under aseptic  
184 condition, prepared discs (5 mm round filter paper soaked with test solution at a concentration of  
185 1mg/mL) were air dried, placed into center of an agar plate by using a sterile forceps and pressed down.  
186 Then discs were employed to be incubated at 37°C within 15 minutes. After 24 & 48 hours of incubation,  
187 each plate was examined. There were uniformly circular zone of inhibition on the surface. The diameter  
188 of the complete zone of inhibition was measured. All tests were performed in triplicate manner.

189

## 190 **3. Results**

### 191 **3.1 Preliminary qualitative phytochemical analysis**

192 The present study exposed that ethanolic extracts of *H. musciformis* and *E. intestinalis* contained different  
193 plant secondary metabolites viz alkaloids, flavonoids, tannins, phenols, and saponins. Preliminary  
194 phytochemicals study revealed that *E. intestinalis* extracts contained flavonoids and saponins in higher  
195 extent on the other hand alkaloids and tannins were present in *Hypnea musciformis* in greater content.  
196 Other secondary metabolites were moderately present in two seaweed extracts (**Table 1**).

197



198

### 199 **3.2 Quantitative determination of the phytochemical constituency**

200 **Table 2** showed the qualitative determination of the tannin, flavonoid and phenolic content. Folin-  
201 Ciocaltue's method was used to determine the total tannin content in different seaweed extracts. The  
202 tannin content was expressed in terms of mg of Tannic acid equivalent per g of dried sample. Ethanolic  
203 extracts of *H. musciformis* and *E. intestinalis* estimated  $51 \pm 0.0002$  and  $43 \pm 0.0002$  mg/g respectively.  
204 However, total flavonoid contents of the extracts were expressed in terms of quercetin equivalent (QE).  
205 *H. musciformis* and *E. intestinalis* estimated  $67 \pm 0.0002$  and  $57 \pm 0.0002$  mg/g respectively. Total  
206 phenolic contents of the extracts were determined in terms of gallic acid equivalent (GAE). *H.*  
207 *musciformis* exhibited higher amount of phenolics ( $59 \pm 0.0002$ ) present in the crude extracts rather than  
208 *E. intestinalis* extracts ( $41 \pm 0.0002$ ).

### 209 **3.3 Antibacterial activity of seaweeds extracts**

210 Two extraction methods, for instances, soaking and water bath method were applied for generating  
211 seaweeds extracts by using ethanol, methanol, acetone and distilled water. The results of antibacterial  
212 activities of the seaweeds extracts against selected bacterial strains are summarized in **Table 3** in terms of  
213 soaking method and **Table 4** for water batch method.

214 In case of soaking method, ethanol extracts of *H. musciformis* and *E. intestinalis* were found more than  
215 10nm inhibition zone against all of the bacterial strains. But, methanol extracts of *E. intestinalis* were  
216 found more active against *Staphylococcus aureus Pseudomonas* as these showed inhibition diameter  
217 greater than 15 mm, which was similar to our studied control; Gentamicin (**Fig. 2**). In soaking method  
218 ethanol extract of *Hypnea musciformis* showed highest zone of inhibition ( $14 \pm 0.76$  mm) against *E. coli*  
219 and methanol extract of *E. intestinalis* showed highest zone of inhibition against *S. aureus* (**Fig. 2**).  
220 Acetone extract of *H. musciformis* show highest zone of inhibition against *S. aureus* but which is less than  
221 *E.intestinalis*.

222 In case of water bath method, *Klebsiella sp.* was found more susceptible to ethanol and methanol extracts  
223 of *Hypnea musciformis* as it showed inhibition zone greater than 15 mm (**Fig. 2**). However, in terms of  
224 *Enteromorpha intestinalis*, inhibition zone was found more than 10nm in maximum antimicrobial tests  
225 against all bacterial strains. Again, *H. musciformis* exhibited more active zone of inhibition against  
226 different microbes rather than *E. intestinalis*.

227

#### 228 **4. Discussion**

229 Phytochemical profiling of the seaweed samples revealed the presence of different phytochemicals in  
230 *Hypnea musciformis* and *Enteromorpha intestinalis*. Phenol, tannin and flavonoids were found in greater  
231 amount in both extracts [38,39]. These phytochemicals could exhibit antimicrobial activity for presence  
232 of the phytochemical constituency. Rojas *et al.* indicated that the antibacterial activity is due to different  
233 chemical agents present in the extract, including flavonoids and triterpenoids and other compounds of  
234 phenolic nature or free hydroxyl group, classified as active antimicrobial compounds [40].

235 Variation in antibacterial activity may be due to the method of extraction, solvent used in extraction and  
236 season at which samples were collected [37]. Several different organic solvents have been used to screen  
237 algae for antibacterial activity [41]. In current study we used alcoholic and aqueous solvents to generate  
238 seaweeds extracts. Ethanol extract of *E. intestinalis* showed highest zone of inhibition against *E. coli*. and  
239 methanol extract of *E. intestinalis* showed highest zone of inhibition against *S. aureus*. Ethanol extract of  
240 *Enteromorpha intestinalis* and methanol extracts of *Hypnea musciformis* were more effective against  
241 selected bacterial strains.

242 The both seaweed extracts (*E. intestinalis*, *H. musciformis*) are effective against gram positive and gram  
243 negative bacteria. Kolanjinathan K, Stella D showed that *Ulva lactua*, *Halimedagracilis*, *Gracilaria*  
244 *edulis*, *Hypnea musciformis*, *Turbinariaconoides*, *Sargassum myricystum* effective against *E. coli*, *P.*  
245 *aeruginosa*, *S. aureus*, *K. pneumoniae*, *E.faecalis* [26,42] which supports the study results. There are

246 some other studies which could strengthen our findings, for example, Tuney I *et al.* illustrated that  
247 *Enteromorpha sp.* is effective against *Candida sp.*, *E. faecalis*, *S. aureus*, *S. epidermidis*, *P. aeruginosa*, *E.*  
248 *coli* [43]. Sukatar A *et al.* reported that *Enteromorpha linza* is highly susceptible to *S. aureus*, *S.*  
249 *epidermidis*, *S. fecalis*, *B. subtilis*, *S. typhimurium*, *P. aeruginosa*, *E. cloacae*, *E. coli*, *C. albicans* [44].  
250 Two different extraction methods were used. Among them *Hypnea musciformis* showed better results in  
251 water bath extraction method and *Enteromorpha intestinalis* was better in soaking method. So it could be  
252 assumed that *Hypnea musciformis* release more bioactive compound in water bath method and  
253 *Enteromorpha intestinalis* in soaking method.

254

## 255 **5. Conclusion**

256 It could be concluded that the both studied seaweeds, *Hypnea musciformis* and *Enteromorpha intestinalis*  
257 possessed potential antimicrobial activities. It may be due the availability of secondary metabolites which  
258 could induce antimicrobial approaches. The strong correlation between the contents of different  
259 secondary metabolites, such as phenols, tannins and flavonoids employs that these phytochemicals and  
260 prime contributors to the antimicrobial potentiality of these seaweeds species.

261

## 262 **Conflict of Interest**

263 There is no conflict of interest regarding the publication of this paper.

264

## 265 **Acknowledgment**

266 We are highly thankful to Professor Dr Abul Kalam Azad as he provided us the pathogenic bacterial  
267 strains for the study.

268

## 269 **Funding source**

270 The project was funded by the Sylhet Agricultural University Research System (SAURES) and  
271 University Grant Commission of Bangladesh.

## 272 **References**

- 273 1. Visvesvara, G. S., Moura, H., Schuster, F. L., 2007. Pathogenic and opportunistic free-living  
274 amoebae: *Acanthamoeba* spp., *Balamuthia mandrillaris*, *Naegleria fowleri*, and *Sappinia*  
275 *diploidea*. *FEMS Immun. Med. Microbiol.* 50, 1–26.
- 276 2. Rose, J. B. *et al.*, 2001. Climate variability and change in the United States: potential impacts  
277 on water-and foodborne diseases caused by microbiologic agents. *Environ. Health*  
278 *Perspect.* 109 (Suppl 2), 211.
- 279 3. Levy, S. B., Marshall, B., 2002. *Antibacterial resistance worldwide: causes, challenges and*  
280 *responses*. *Nat Med.* 12, 122–129.
- 281 4. Buffet-Bataillon, S., Tattevin, P., Bonnaure-Mallet, M., & Jolivet-Gougeon, 2012.  
282 *A. Emergence of resistance to antibacterial agents: the role of quaternary ammonium*  
283 *compounds-a critical review*. *Int J. Antimicrob Ag.* 5, 381–389.
- 284 5. Bernini, R. *et al.*, 2011. *Chemoselective C-4 Aerobic Oxidation of Catechin Derivatives*  
285 *Catalyzed by the Trametes villosa Laccase/1-Hydroxybenzotriazole System: Synthetic and*  
286 *Mechanistic Aspects*. *J. Org Chem.* 76, 820–832.
- 287 6. Kijjoo, A., Sawangwong, P., 2004. Drugs and cosmetics from the sea. *Mar. Drugs.* 2, 73–82.
- 288 7. Proksch, P., Ebel, R.E., Ebel, R., 2003. Drugs from the sea-opportunities and obstacles. *Mar.*  
289 *Drugs.* 1, 5–17.
- 290 8. Proksch, P., 1994. Defensive roles for secondary metabolites from marine sponges and sponge  
291 feeding-nudibranchs. *Toxicon.* 32, 639–55.
- 292 9. Kelecom, A., Teixeira, V.L., 1986. Diterpenes of marine brown algae of the family Dictyotaceae:  
293 their possible role as defense compounds and their use in chemotaxonomy. *Sci. Total Environ.*  
294 58(1–2), 109–15.

- 295 10. Nygaard, K., Lunestad, B.T., Hektoen, H., Berge, J.A., Hormazabal, V., 1992. Resistance to  
296 oxytetracycline, oxolinic acid and furazolidone in bacteria from marine sediments. *Aquaculture*.  
297 1;104(1-2):31-6.
- 298 11. Vairappan, C.S., Kawamoto, T., Miwa, H., Suzuki, M., 2004. Potent antibacterial activity of  
299 halogenated compounds against antibiotic-resistant bacteria. *Planta medica*. 70(11), 1087-90.
- 300 12. Bhadury, P., & Wright, P. C., 2004. Exploitation of marine algae: biogenic compounds for  
301 potential antifouling applications. *Planta*. 219(4), 561-578.
- 302 13. Faulkner, D. J., 2001. Marine natural products. *Natural product reports*. 18(1), 1R-49R
- 303 14. Manilal, A., Sujith, S., Selvin, J., Kiran, G. S., Shakir, C., & Lipton, A. P., 2010. Antimicrobial  
304 potential of marine organisms collected from the southwest coast of India against multiresistant  
305 human and shrimp pathogens. *Scientia Marina*. 74(2), 287-296.
- 306 15. Zbakh, H., Chiheb, H., Bouziane, H., Sánchez, V. M., & Riadi, H., 2012. Antibacterial activity of  
307 benthic marine algae extracts from the Mediterranean coast of Morocco. *The Journal of*  
308 *Microbiology, Biotechnology and Food Sciences*. 2(1), 219.
- 309 16. Bouhlal, R., Haslin, C., Chermann, J. C., Collic-Jouault, S., Sinquin, C., Simon, G. &  
310 Bourgougnon, N., 2011. Antiviral activities of sulfated polysaccharides isolated from  
311 *Sphaerococcus coronopifolius* (Rhodophyta, Gigartinales) and *Boergeseniella thuyoides*  
312 (Rhodophyta, Ceramiales). *Mar. drugs*. 9(7), 1187-1209.
- 313 17. NA, H.J., Moon, P.D., Lee, H.J., Kim, H.R., Chae, H.J., Shin, T., Seo, Y., Hong, S.H., Kim,  
314 H.M., 2005. Regulatory effect of atopic allergic reaction by *Carpopeltis affinis*. In *Journal of*  
315 *Ethnopharmacology*. 101, 43–48. S
- 316 18. Dayong, S., Jing, L., Shuju, G., Lijun, H., 2008. Antithrombotic effect of bromophenol, the alga-  
317 derived thrombin inhibitor. In *Journal of Biotechnology*. 136, 577–588.

- 318 19. Kim, J. Y., Lee, J. A., Kim, K. N., Yoon, W. J., Lee, W. J., & Park, S. Y., 2007. Antioxidative  
319 and antimicrobial activities of *Sargassum muticum* extracts. *Journal of the Korean Society of*  
320 *Food Science and Nutrition.* 36(6), 663-669.
- 321 20. Sunda, W.K., Kieber, D.J., Kiene, R.P., 2002. Huntsman S. An antioxidant function for DMSP  
322 and DMS in marine algae. *Nature.* 418(6895):317.
- 323 21. Devi, G.K., Manivannan, K., Thirumaran, G., Rajathi, F.A.A., Anantharaman, P., 2011. In vitro  
324 antioxidant activities of selected seaweeds from Southeast coast of India. In *Asian Pacific Journal*  
325 *of Tropical Medicine.* 4, 205–211.
- 326 22. Gonzalez del Val, A., Platas, G., Basilio, A., 2001. Screening of antimicrobial activities in red,  
327 green and brown macroalgae from Gran Canaria (Canary Islands, Spain). *Int. Microbiol.* 4, 35-40.
- 328 23. Watson, S. B., & Cruz-Rivera, E., 2003. Algal chemical ecology: an introduction to the special  
329 issue. *Phycologia.* 42(4), 319-323.
- 330 24. Aiyegoro, O.A., Okoh, A.I., 2010. Preliminary phytochemical screening and in vitro antioxidant  
331 activities of the aqueous extract of *Helichrysum longifolium* DC. *BMC complementary and*  
332 *alternative medicine.* 10(1):21.
- 333 25. Kharkwal, H., Joshi, D. D., Panthari, P. R. E. E. T. I., Pant, M. K., & Kharkwal, A. C. (2012).  
334 Algae as future drugs. *Asian J Pharm Clin Res,* 5, 1-4.
- 335 26. Kolanjinathan, K., & Stella, D., 2009. Antibacterial activity of marine macro algae against human  
336 pathogens. *Recent Research in Science and Technology.* 1(1).
- 337 27. Roos, N., 2001. Fish consumption and aquaculture in rural Bangladesh: nutritional contribution  
338 and production potential of culturing small indigenous fish species (SIS) in pond polyculture with  
339 commonly cultured carps. Doctoral thesis. Research Department of Human Nutrition, The Royal  
340 Veterinary and Agricultural University, Frederiksberg, Denmark
- 341 28. Sarker, M.N., 1992. Studies on the red sea weeds in Bangladesh. A paper presented at the  
342 Regional Workshop on the Taxonomy, Ecology and Processing of Commercially Important Red

- 343 Sea Weeds, 21–28th April, 1992, held at Kasetsart University in Bangkok, Thailand, Organized  
344 by FAO/NACA and France Govt.
- 345 29. Ahmed, N., Taparhudee, W., 2005. Seaweed cultivation in Bangladesh: problems and potentials.  
346 Kasetsart University Fisheries Research Bulletin. 28, 13-21.
- 347 30. Peach, K., Tracey, M.V., 1956. Modern methods of plant analysis. Springer Verlag, Berlin. Vol.  
348 3
- 349 31. Bauer, A. W., Kirby, W. M., Sherris, J. C., & Turck, M., 1966. Antibiotic susceptibility testing  
350 by a standardized single disk method. American journal of clinical pathology. 45(4), 493.
- 351 32. Harborne, J.B., 1998. Phytochemical methods: A guide to modern techniques of plant analysis.  
352 3rd ed. Chapman and Hall Int. (Ed).NY. 49–188
- 353 33. Trease, G.E., Evans, W.C., 2002. Pharmacognosy. 15th Ed. London: Saunders Publishers. 42–44,  
354 221–229, 246–249, 304–306, 331–332, 391–393.
- 355 34. Kavitha Chandran, C.I., Indira, G., 2016. Quantitative estimation of total phenolic, flavonoids,  
356 tannin and chlorophyll content of leaves of *Strobilanthes Kunthiana* (Neelakurinji). Journal of  
357 Medicinal Plants Studies. 4(4): 282-286
- 358 35. Gupta, A., Birhman, K., Raheja, I., Sharma, S.K., Kar, H.K., 2016. Quercetin: A wonder  
359 bioflavonoid with therapeutic potential in disease management. Asian Pacific Journal of Tropical  
360 Disease. 1;6(3):248-52.
- 361 36. Singleton, V.L., Orthofer, R., Lamuela-Raventós, R.M., 1999. Analysis of total phenols and other  
362 oxidation substrates and antioxidants by means of folin-ciocalteu reagent. In Methods in  
363 enzymology. 299, 152-178.
- 364 37. Kandhasamy, M., & Arunachalam, K. D., 2008. Evaluation of in vitro antibacterial property of  
365 seaweeds of southeast coast of India. African journal of Biotechnology. 7(12).
- 366 38. Marasneh, I., Jamal, M., Kashasneh, M., Zibdeh, M., 1995. Antibiotic activity of marine algae  
367 against multi-antibiotic resistant bacteria. Microb. 83, 23-26.

- 368 39. Cordeiro, R.A., Gomes, V.M., Carvalho, A.F., Melo, V.M., 2006. Effect of proteins from the red  
369 seaweed *Hypnea musciformis* (Wulfen) Lamouroux on the growth of human pathogen yeasts.  
370 Brazilian Archives of Biology and Technology. 49(6):915-21.
- 371 40. Tuney, I., Cadirci, B.H., Unal, D., Sukatar, A. 2006. Antimicrobial activities of the extracts of  
372 marine algae from the coast of Urla (Izmir, Turkey). Turk. J. Biol. 30, 1-5.
- 373 41. Sukatar, A., Karabay-yavasoglu, N.U., Ozdemir, G., Horzum, Z., 2006. Antimicrobial activity of  
374 volatile component and various extracts of *Enteromorpha linza* (Linnaeus) J. Agardh from the  
375 coast of Izmir, Turk. Ann. Microbiol. 56(3), 275-279.
- 376 42. Moses, B.J., Trivedi, G.K., Mathur, H.H., 1989. Diketosteroid from marine red alga *Hypnea*  
377 *musciformis*. Phytochemistry. 1;28(11):3237-9.
- 378 43. Ahmed, S.R., Roy, R., Romi, I.J., Hasan, M., Bhuiyan, M.K.H., Khan, M.M.H., 2019.  
379 Phytochemical screening, antioxidant and antibacterial activity of some medicinal plants grown in  
380 Sylhet region. IOSR Journal of Pharmacy and Biological Sciences (IOSR-JPBS). 14(1), 26-37.
- 381 44. Rojas, A., Hernandez, L., Pereda-Miranda, R., & Mata, R., 1992. Screening for antimicrobial  
382 activity of crude drug extracts and pure natural products from Mexican medicinal plants. Journal  
383 of ethnopharmacology, 35(3), 275-283.

384

385

## 386 **Tables**

387

388 Table 1 Phytochemical Screening of *Hypnea musciformis* and *Enteromorpha intestinalis*

389 Table 2 Quantitative determination of phytochemical constituency

390 Table 3 Screening of antibacterial activity of seaweed extracts by soaking method

391 Table 4 Screening of antibacterial activity of seaweed extracts by water bath method



392 **Figure legend**

393 **Fig. 1** Sample collection site (21°35'0"N 92°01'0"E)

394 **Fig. 2** Growth inhibition zone of of different extracts of *Hypnea musciformis* and *Enteromorpha*  
395 *intestinalis*. (A) *E. intestinalis* ethanol extract against *E. coli* (soaking method). (B) *E. intestinalis* and *H.*  
396 *musciformis* methanol extract (soaking method) against *S. aureus*. (C) *H. musciformis* ethanol extract  
397 against *Klebsiella sp.* (Water bath method). (D) *E. intestinalis* and *H. musciformis* acetone extracts against  
398 *S. aureus*(soaking method). (E) Gentamicin against *Klebsiella sp.* (F) Gentamicin against *Staphylococcus*  
399 *aureus*.

400

401

402

403

404

405

406

407

408

409

410

411

412 **Table 1** Phytochemical Screening of *Hypnea musciformis* and *Enteromorpha intestinalis*

| <i>Name of Test</i> | <i>Method of Test</i>     | <i>Seaweed</i>            |                                  |
|---------------------|---------------------------|---------------------------|----------------------------------|
|                     |                           | <i>Hypnea musciformis</i> | <i>Enteromorpha intestinalis</i> |
| Flavonoids          | Sodium Hydroxide test     | ++                        | ++                               |
|                     | Shinodas test             | ++                        | +++                              |
| Alkaloids           | Wagner's test             | +++                       | +                                |
|                     | Dragendorff's test        | ++                        | +                                |
| Tannins             | Potassium dichromate test | +++                       | ++                               |
|                     | Ferric chloride test      | ++                        | ++                               |
| Phenols             | -                         | ++                        | ++                               |
| Saponins            | Froth test                | ++                        | +++                              |

413 [+++ : Higher presence, ++: Moderate presence, ++: Low presence]

414

415

416

417

418

419

420 **Table 2** Quantitative determination of phytochemical constituency

| <i>Seaweeds Extracts (1<br/>mg/mL)</i> | <i>Quantitative determination of selected phytochemicals</i> |                                                        |                                                                       |                                                        |
|----------------------------------------|--------------------------------------------------------------|--------------------------------------------------------|-----------------------------------------------------------------------|--------------------------------------------------------|
|                                        | <i>Tannic content<br/>(mg TAE/g<br/>sample)</i>              | <i>Phenolics<br/>content<br/>(mg GAE/g<br/>sample)</i> | <i>Flavonoid<br/>content (mean ±<br/>SD)<br/>(mg QE/g<br/>sample)</i> | <i>Phenolics<br/>content<br/>(mg GAE/g<br/>sample)</i> |
| <i>H. musciformis</i>                  | 51 ± 0.0002                                                  | 59 ± 0.0002                                            | 67 ± 0.0002                                                           | 59 ± 0.0002                                            |
| <i>E. intestinalis</i>                 | 43 ± 0.0002                                                  | 41 ± 0.0002                                            | 57 ± 0.0002                                                           | 41 ± 0.0002                                            |

421

422

423

424

425

426

427

428

429

430

431

432

433 **Table 3 Screening of antibacterial activity of seaweed extracts by soaking method**

| <i>Seaweed</i>                   | <i>Solvent</i>  | <i>Gram positive bacteria</i> | <i>Gram negative bacteria</i> |                       |                        |                       |
|----------------------------------|-----------------|-------------------------------|-------------------------------|-----------------------|------------------------|-----------------------|
|                                  |                 | <i>S. aureus</i>              | <i>E.coli</i>                 | <i>Klebsiella sp.</i> | <i>Pseudomonas sp.</i> | <i>Salmonella sp.</i> |
| <i>Hypnea musciformis</i>        | Ethanol         | ++                            | ++                            | ++                    | ++                     | ++                    |
|                                  | Methanol        | +                             | ++                            | +                     | ++                     | ++                    |
|                                  | Acetone         | -                             | +                             | +                     | +                      | +                     |
|                                  | Distilled water | ++                            | ++                            | ++                    | ++                     | ++                    |
| <i>Enteromorpha intestinalis</i> | Ethanol         | ++                            | ++                            | ++                    | ++                     | ++                    |
|                                  | Methanol        | +++                           | ++                            | ++                    | +++                    | ++                    |
|                                  | Acetone         | +++                           | +                             | ++                    | ++                     | ++                    |
|                                  | Distilled water | ++                            | +                             | ++                    | ++                     | ++                    |
| Gentamicin (Control)             |                 | +++                           | +++                           | +++                   | +++                    | +++                   |

434 —: no activity; +: inhibition diameter < 10 mm; ++: inhibition diameter < 15 mm; +++: inhibition  
 435 diameter < 20 mm;

436

437 **Table 4 Screening of antibacterial activity of seaweed extracts by water bath method**

| <i>Seaweed</i>         | <i>Solvent</i>  | <i>Gram positive bacteria</i> | <i>Gram negative bacteria</i> |                       |                        |                       |
|------------------------|-----------------|-------------------------------|-------------------------------|-----------------------|------------------------|-----------------------|
|                        |                 | <i>Staphylococcus aureus</i>  | <i>E. coli</i>                | <i>Klebsiella sp.</i> | <i>Pseudomonas sp.</i> | <i>Salmonella sp.</i> |
| <i>H. musciformis</i>  | Ethanol         | ++                            | ++                            | +++                   | ++                     | ++                    |
|                        | Methanol        | ++                            | ++                            | +++                   | ++                     | ++                    |
|                        | Acetone         | ++                            | ++                            | ++                    | ++                     | ++                    |
|                        | Distilled water | ++                            | ++                            | ++                    | ++                     | ++                    |
| <i>E. intestinalis</i> | Ethanol         | ++                            | ++                            | ++                    | ++                     | ++                    |
|                        | Methanol        | ++                            | ++                            | ++                    | ++                     | +                     |
|                        | Acetone         | ++                            | ++                            | ++                    | ++                     | ++                    |
|                        | Distilled water | +                             | ++                            | ++                    | ++                     | ++                    |
| Gentamicin (Control)   |                 | +++                           | +++                           | +++                   | +++                    | +++                   |

438 —: no activity; +: inhibition diameter < 10 mm; ++: inhibition diameter < 15 mm; +++: inhibition  
 439 diameter < 20 mm;

440

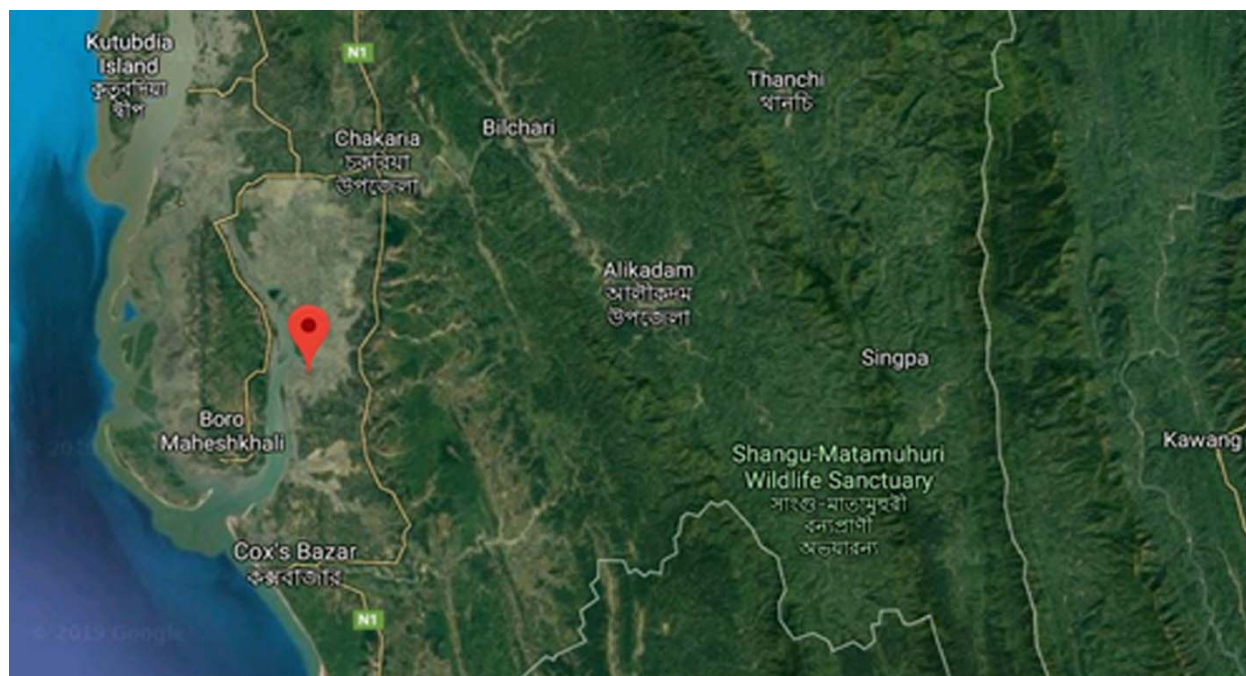

441 **Fig. 1** Sample collection site (21°35'0"N 92°01'0"E)

442

443

444

445

446

447

448

449

450

451

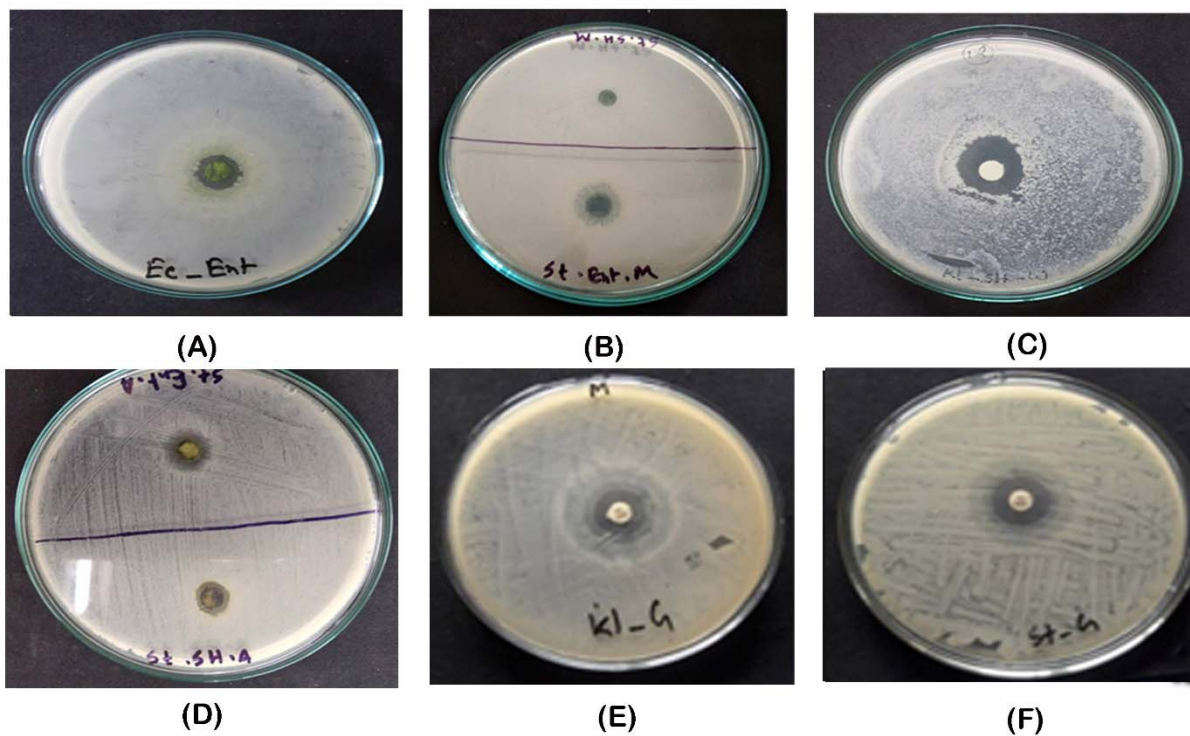

452

453 **Fig. 2** Growth inhibition zone of of different extracts of *Hypnea musciformis* and *Enteromorpha*  
454 *intestinalis*. (A) *E. intestinalis* ethanol extract against *E. coli* (soaking method). (B) *E. intestinalis* and *H.*  
455 *musciformis* methanol extract (soaking method) against *S. aureus*. (C) *H. musciformis* ethanol extract  
456 against *Klebsiella sp.* (Water bath method). (D) *E. intestinalis* and *H. musciformis* acetone extracts against  
457 *S. aureus*(soaking method). (E) Gentamicin against *Klebsiella sp.* (F) Gentamicin against *Staphylococcus*  
458 *aureus*.



Kutubdia  
Island  
কুতুবদিয়া  
দ্বীপ

N1

Thanchi  
থানচি

Chakaria  
চকরিয়া  
উপজেলা

Bilchhari

Alikadam  
আলীকদম  
উপজেলা

Singpa

Boro  
Maheshkhali

Kawang

Shangu-Matamuhuri  
Wildlife Sanctuary  
শাংগু-মাতামুহুরী  
বন্যপ্রাণী  
অভয়ারণ্য

Cox's Bazar  
কক্সবাজার

N1



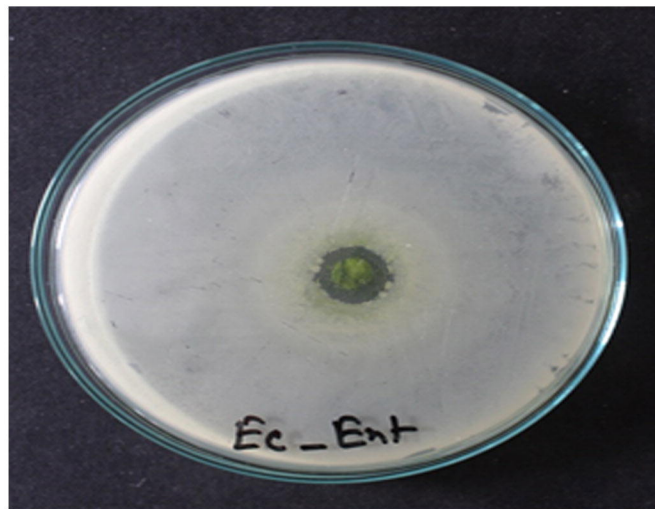

(A)

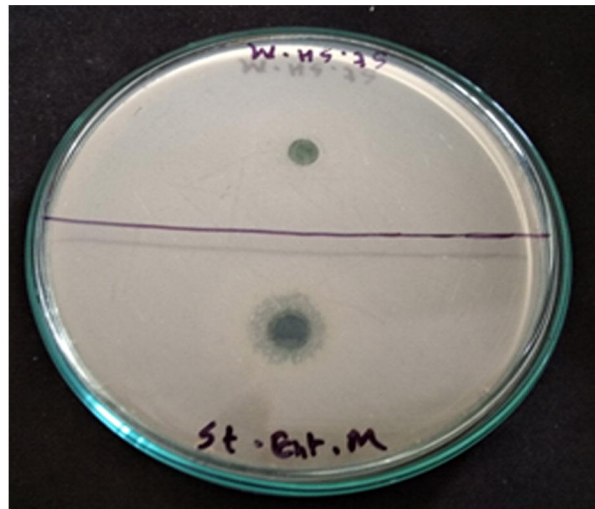

(B)

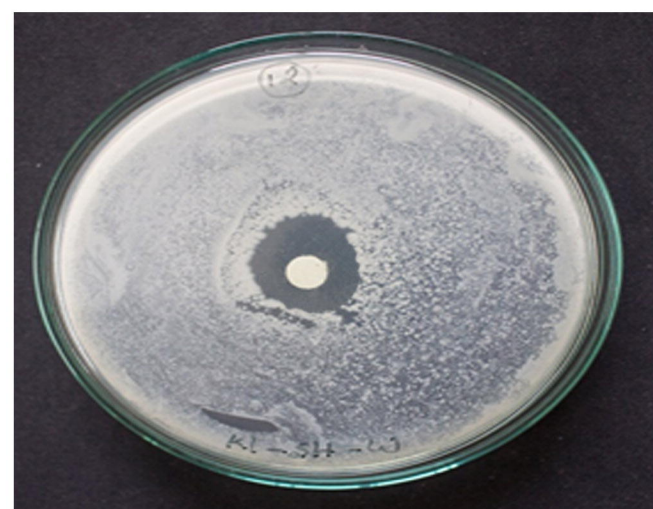

(C)

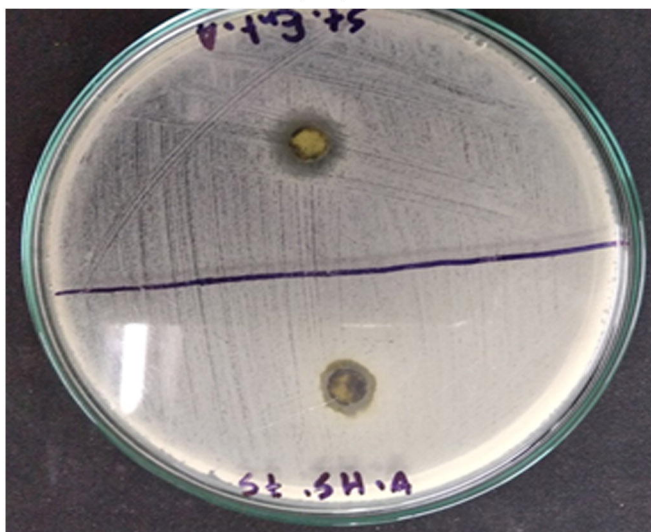

(D)

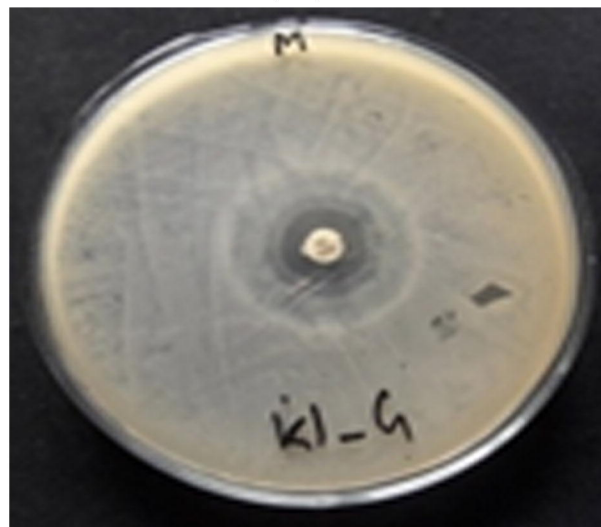

(E)

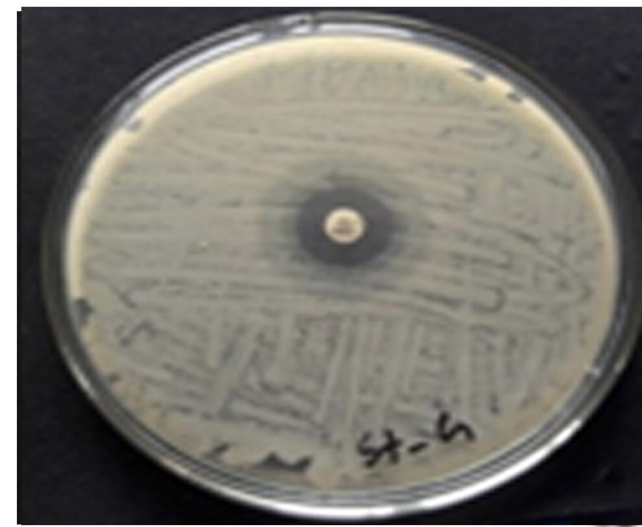

(F)
